# Supplementary material for: Iron(ii) spin crossover films on Au(111): scanning probe microscopy and photoelectron spectroscopy
Source: Royal Society of Chemistry journal article supplement (doi:10.1039/c3cc44904a), 2013-01-01
Supplement: c3cc44904a.pdf [file c3cc44904a.pdf]

### Supplemental Information:

#### Iron (II) Spin Crossover Films on Au(111) : Scanning Probe Microscopy and Photoelectron Spectroscopy

Alex Pronschinske<sup>1</sup>, Robert Bruce<sup>2</sup>, Geoff Lewis<sup>3</sup>, Yifeng Chen<sup>1</sup>, Arrigo Calzolari,<sup>4</sup> Marco Buongiorno-Nardelli<sup>1†</sup>, David A. Shultz<sup>3</sup>, Wei You<sup>2</sup>, and Daniel B. Dougherty<sup>1\*</sup>

1.Department of Physics, North Carolina State University, Raleigh, N.C. 27695

2.Department of Chemistry, University of North Carolina at Chapel Hill, Chapel Hill, N.C.

3.Department of Chemistry, North Carolina State University, Raleigh, N.C. 27695

4. CNR-NANO, Istituto Nanoscienze, Centro S3 I-41125, Modena, Italy

Figure S1 below shows UPS spectra measured under conditions described in the main text for an as-loaded bilayer film in comparison . The changes in inelastic background intensity and secondary electron cut-off near 16 eV binding energy are consistent with the removal of weakly physisorbed ambient contaminants that slightly change the surface dipole layer.

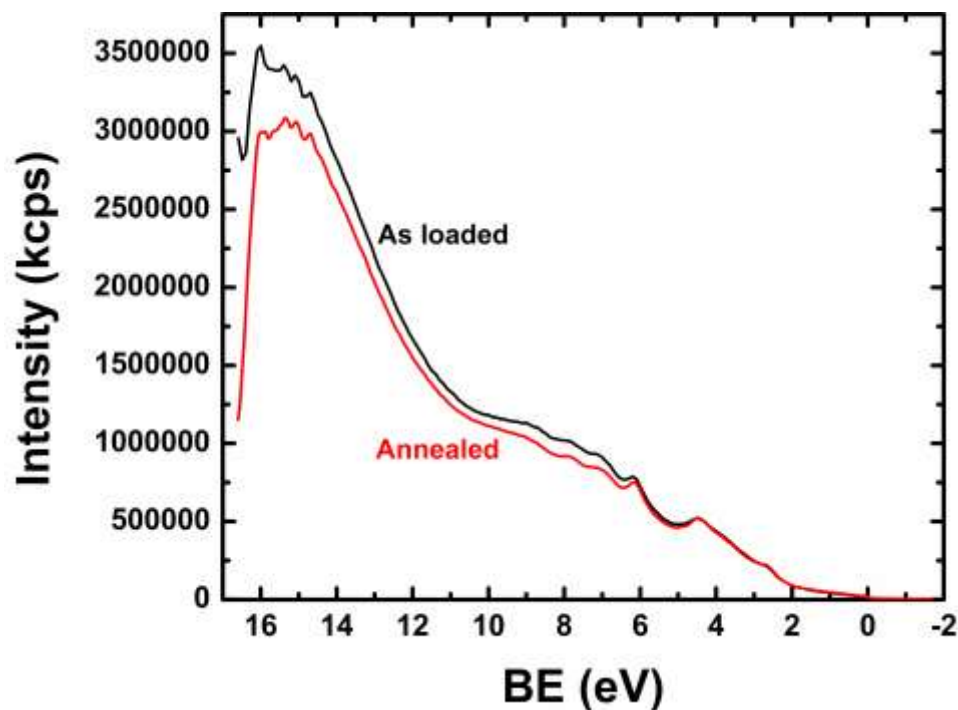

Figure S1.
